# Supplementary material
Source: HighWire-hosted journal article supplement (http://www.cmaj.ca/highwire/filestream/57632/field_highwire_adjunct_files/0/synth-straus-1-at.pdf)
Supplement: synth-straus-1-at.pdf [file synth-straus-1-at.pdf]

**Appendix 1** (as submitted by the authors): **Example of selected components of a patient decision aid**

**1.0 Patient Decision Aid presentation of outcome probabilities**

Blocks of 100 faces show a ‘best estimate’ of what happens to **100 people** who choose different options [specify time period]. Each face [☹] stands for one person. The shaded areas show the number of people affected. There is no way of knowing in advance if you will be the one who is affected.

**Benefits**

- \* [Fewer/More] people **get a** if they [insert option] .....→

Describe what it is like to experience this

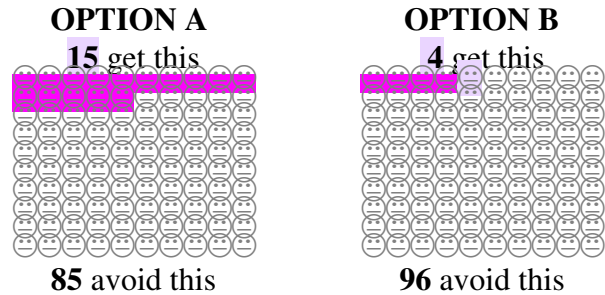

**Risks and Side Effects**

- \* More people who [insert option] have **risk/side effect a** .....→

Describe what it is like to experience this

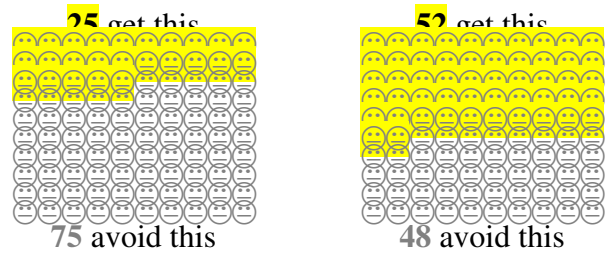

\* Platinum or \* Gold symbols mean stronger study results; \* Silver or \* Bronze mean weaker results.

**2.0 Patient Decision Aid exercise to clarify patients’ values for outcomes**

Common reasons to choose each option are listed below.

Check ✓ how much each reason matters to you on a scale from 0 to 5.

‘0’ means it is **not** important to you. ‘5’ means it is **very** important to you.

| Reasons to choose                                                                        | Not Important | Very Important |
|------------------------------------------------------------------------------------------|---------------|----------------|
| <b>OPTION A</b>                                                                          |               |                |
| How important is it to you to [get the benefit of option A]?                             | ① ② ③ ④ ⑤     |                |
| How important is it to you to [avoid a risk/side effect/inconvenience] of the option B]? | ① ② ③ ④ ⑤     |                |
| <b>OPTION B</b>                                                                          |               |                |
|                                                                                          | Not Important | Very Important |

How important is it to you to [get the benefit of option B?

① ② ③ ④ ⑤

How important is it to you to [avoid a risk/side effect/inconvenience] of the option A]? .....

① ② ③ ④ ⑤
